# Supplementary material for: Specific Binding of the α-Component of the Lantibiotic Lichenicidin to the Peptidoglycan Precursor Lipid II Predetermines Its Antimicrobial Activity
Source: MDPI journal article supplement (doi:10.3390/ijms24021332), 2023-01-10
Supplement: s1 [file s1]

A

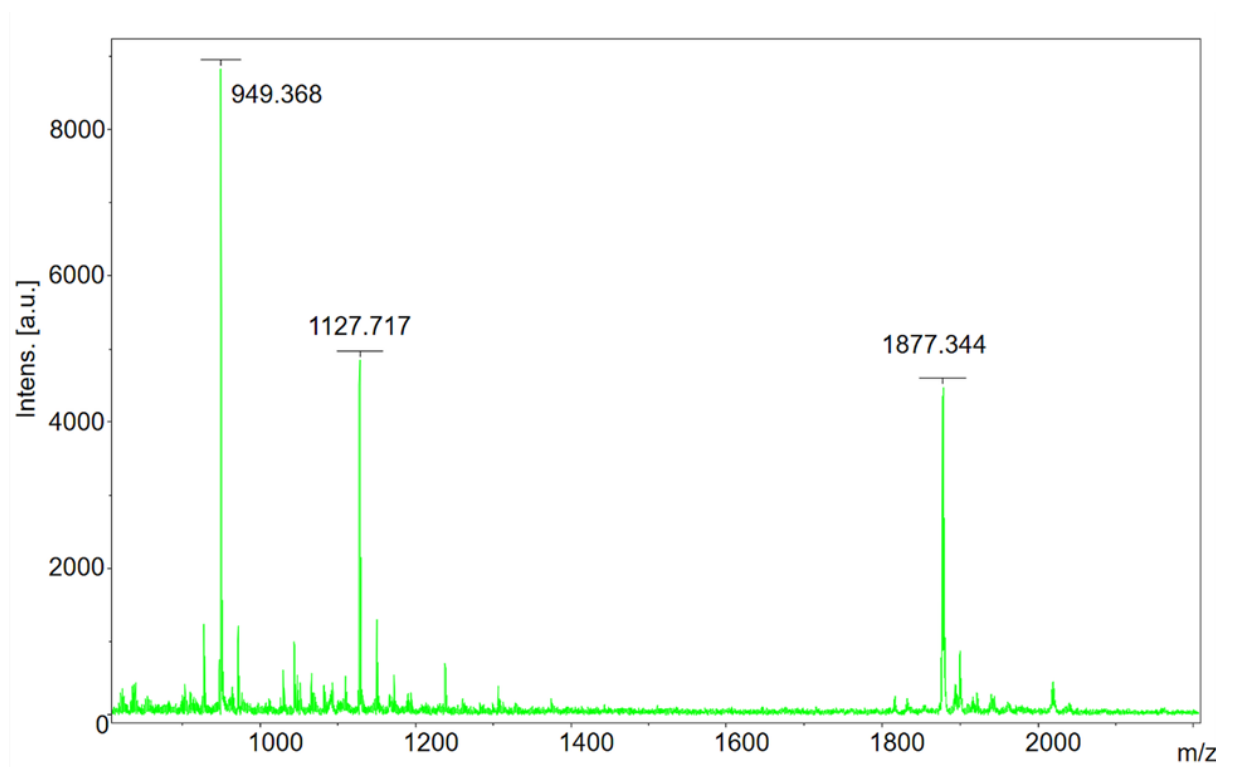

B

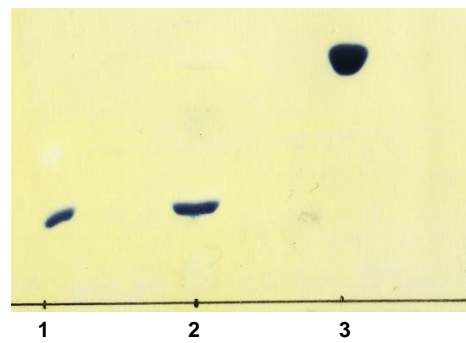

**Figure S1. (A) Typical mass spectrometry of purified lipid II.** Final preparation containing lipid II (m/z 1877), and the by-products: GlcNAc-MurNAc-pentapeptide (m/z 949) and GlcNAc-MurNAc-(pentapeptide)-pyrophosphate (m/z 1127). **(B) Thin layer chromatography of purified lipid II (2)** in comparison to the following control samples: lipid II control (1) and C55P precursor (3).

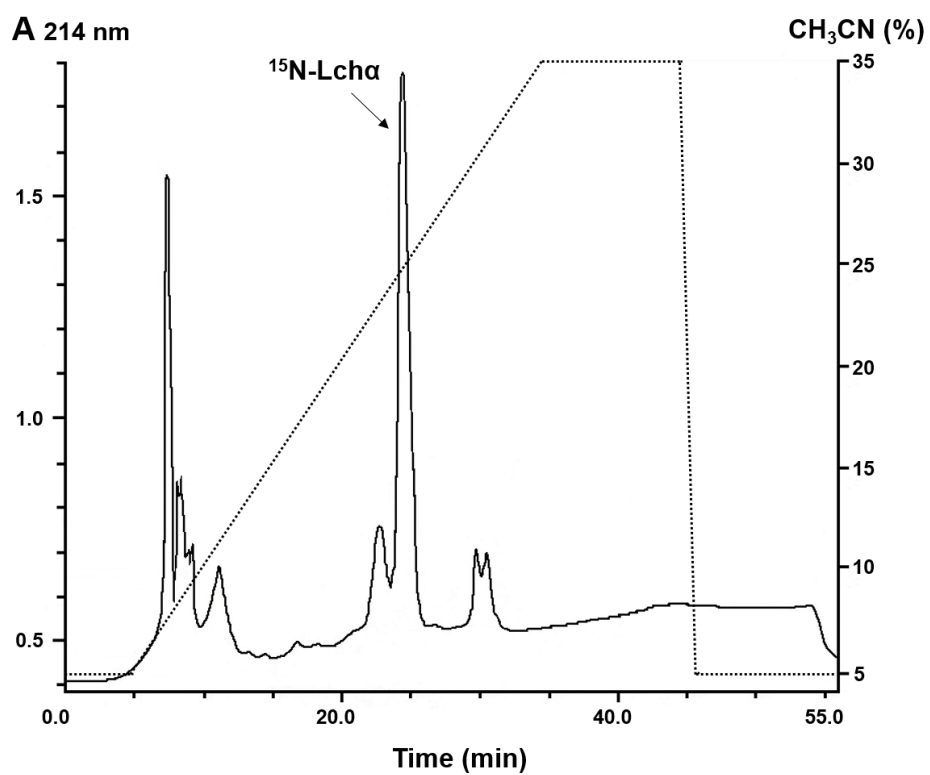

Figure S2. Reversed-phase HPLC purification of <sup>15</sup>N-Lchα.

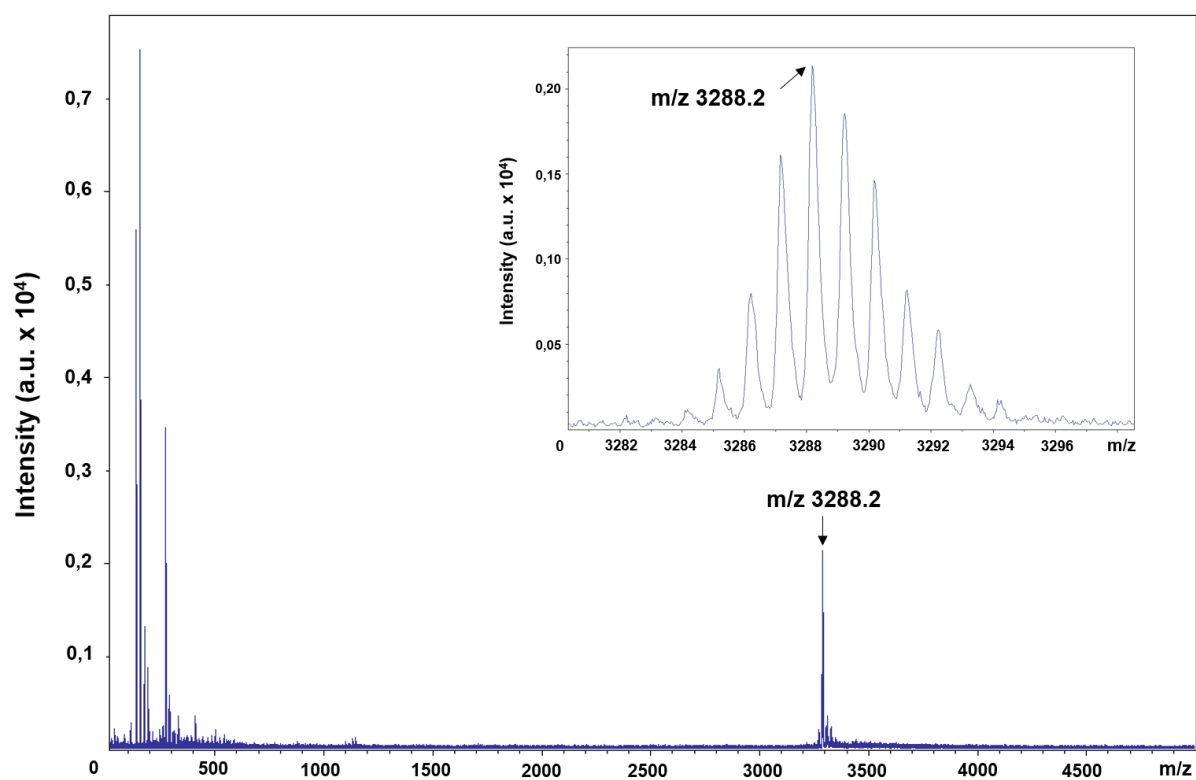

Figure S3. MALDI-TOF mass-spectrum of  $^{15}\text{N}$ -labeled Lch $\alpha$ . The calculated m/z  $[\text{M}+\text{H}]^+$  for fully  $^{15}\text{N}$ -Lch $\alpha$  is 3288.6.

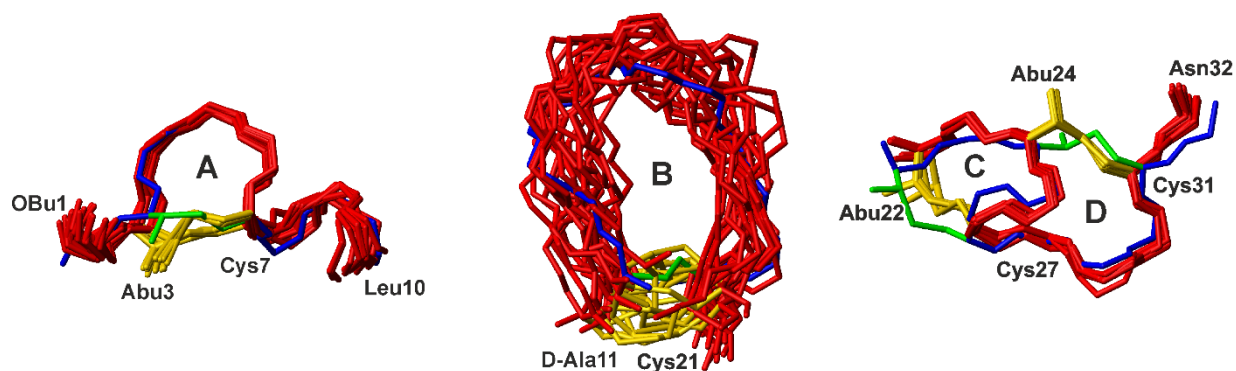

**Figure S4. Superimposition of 20 calculated structures of Lch $\alpha$  at the level of individual domains.** The peptide backbone is colored *red*. The lanthionine and methyllanthionine bridges are colored *orange*. Thioether bridging rings are marked with the capital letters A, B, C, and D. The previous structure of Lch $\alpha$  with incorrect configuration at the C $\beta$  atom of Abu residues (R instead of S) is shown by *blue/green*.

16

17

18

19

20

21

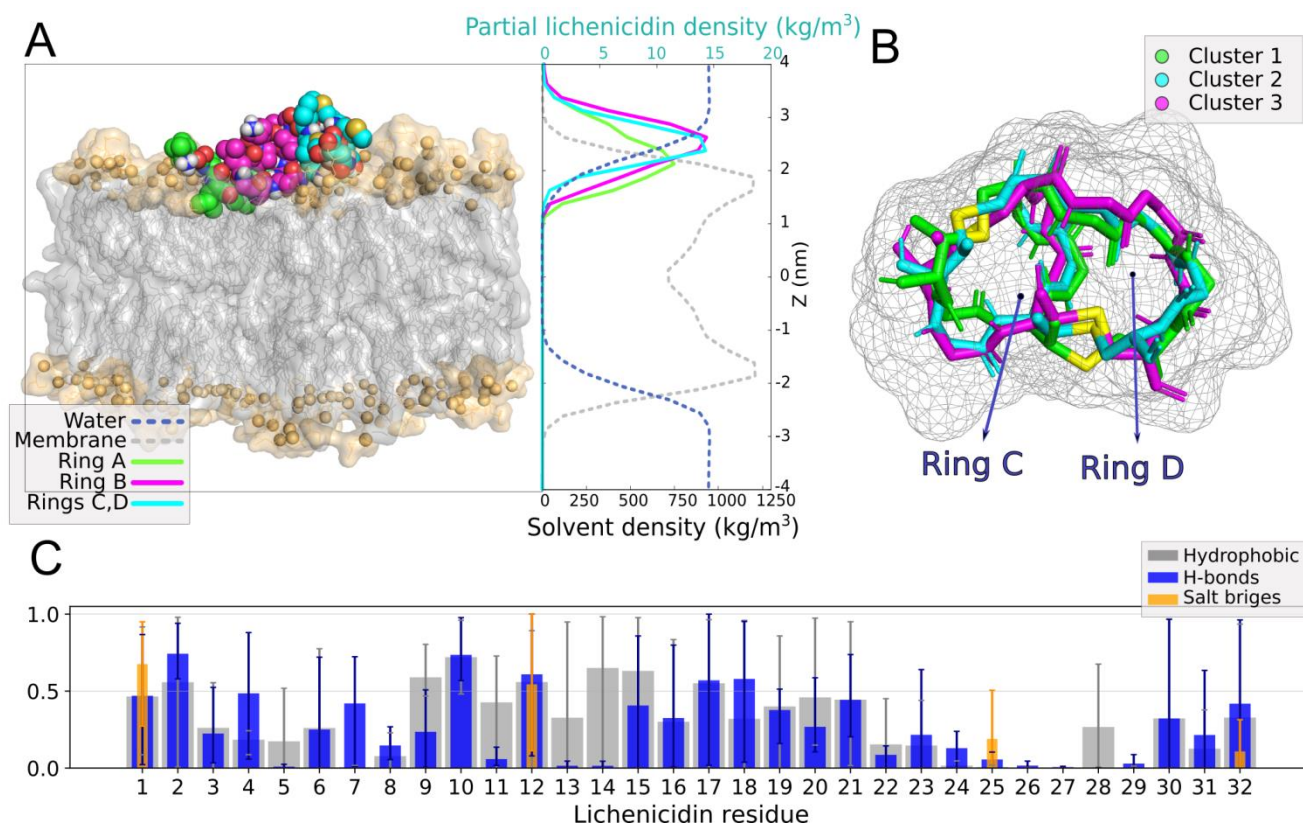

**Figure S5. Lcha interaction with the model bacterial membrane, revealed in MD simulations.** (A) Overview of Lcha interaction with the membrane (*left*). The average density profiles of Lcha rings A (*green*), B (*magenta*) and C, D (*cyan*) (top axis) at the membrane-water interface (bottom axis) as a function of the distance from the bilayer center ( $Z$ ) (*right*). (B) The membrane-bound states of the Lcha C-terminal fragment (rings C and D, residues 22–32) superimposed over the backbone atoms. Disordered C-terminal residues and side chains are not shown for clarity. Clusters of conformers are numbered as their population decreases. Molecular surface of the corresponding structures in clusters #1–4 with the side chains is shown with grey mesh. (C) Lcha–membrane interaction profile. Patterns of hydrophobic (grey) H-bonds (*blue*) and ionic (*orange*) protein–lipid interactions are shown (distance cutoff of 4 Å). Error bars indicate the deviation along the trajectories. Please note, that the N-terminal 2-oxobutyl group was replaced with the valine residue.

22

23

24

25

26

27

28

29

30

31

32

33

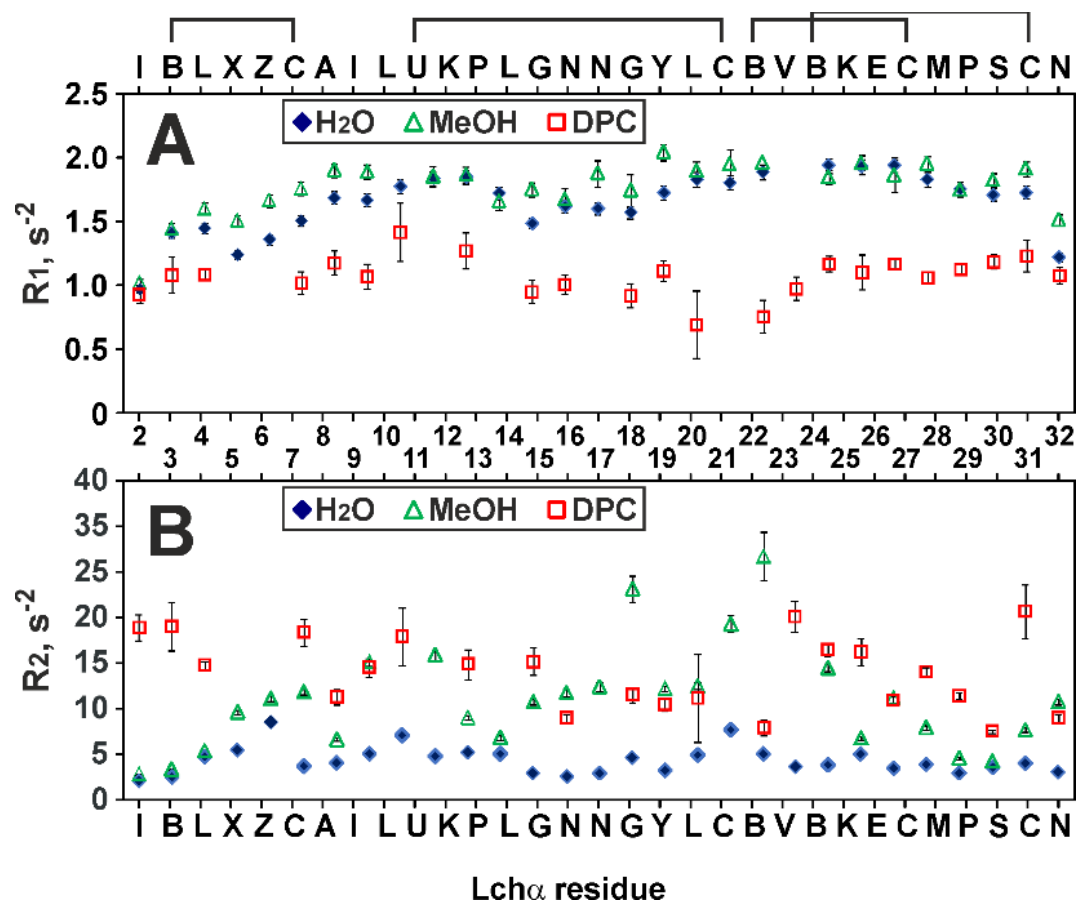

Figure S6. R1 and R2 <sup>15</sup>N relaxation rates measured at 80 MHz for Lch $\alpha$  in water, methanol, and DPC micelles.

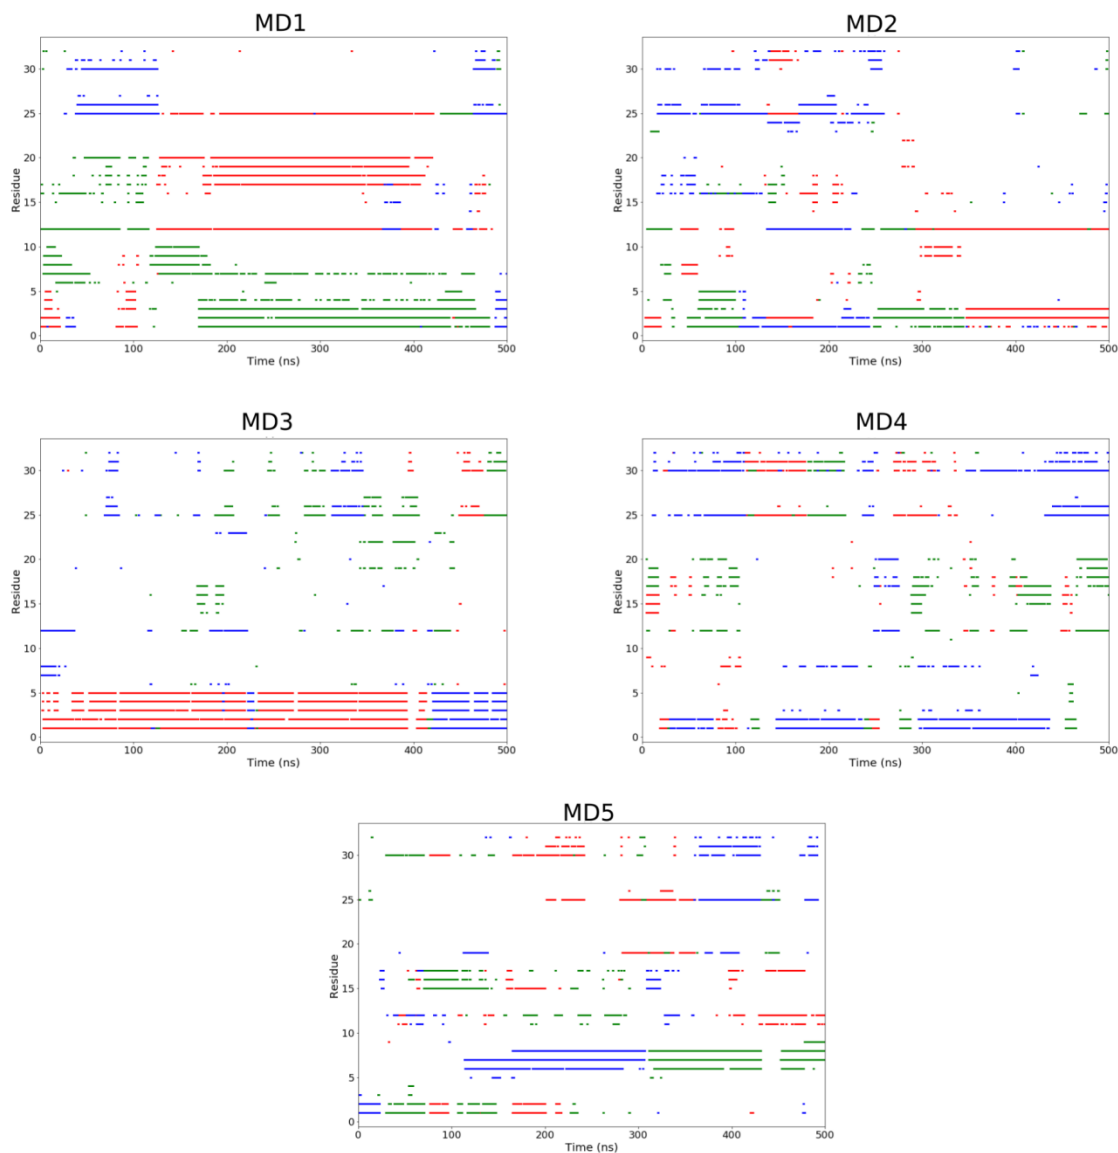

**Figure S7. Spontaneous formation of Lch $\alpha$ /DMPPi complexes in MD.** Hydrogen bonds maps between the peptide backbone and three DMPPi ions. Each dot indicates the H-bond between different DMPPi ions (*different colors*) and particular residue of Lch $\alpha$  (vertical axis) at a given MD time (horizontal axis). Results of five independent MD simulations.

37

38

39

40

41

42

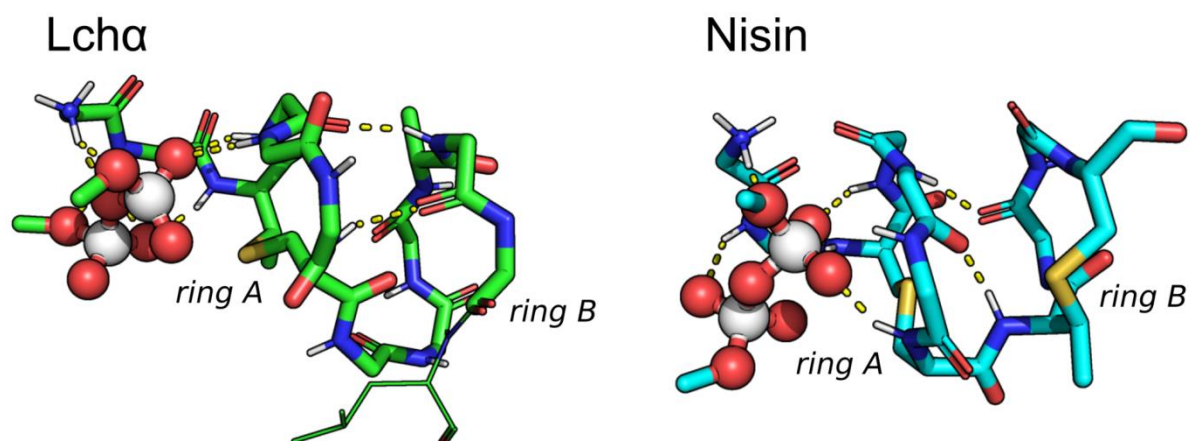

**Figure S8. Binding modes of Lcha's and nisin's N-terminus to DMPPi revealed in MD simulations.** Backbone of the peptides residues 1–13 is shown with *sticks*, wherein carbon — *green* (Lcha) or *cyan* (nisin), oxygen — *red*, phosphorus — *white*, sulphur — *yellow*; peptides side chain atoms are hidden. H-bonds are depicted with yellow dotted lines.

43

44

45

46

47

48

49



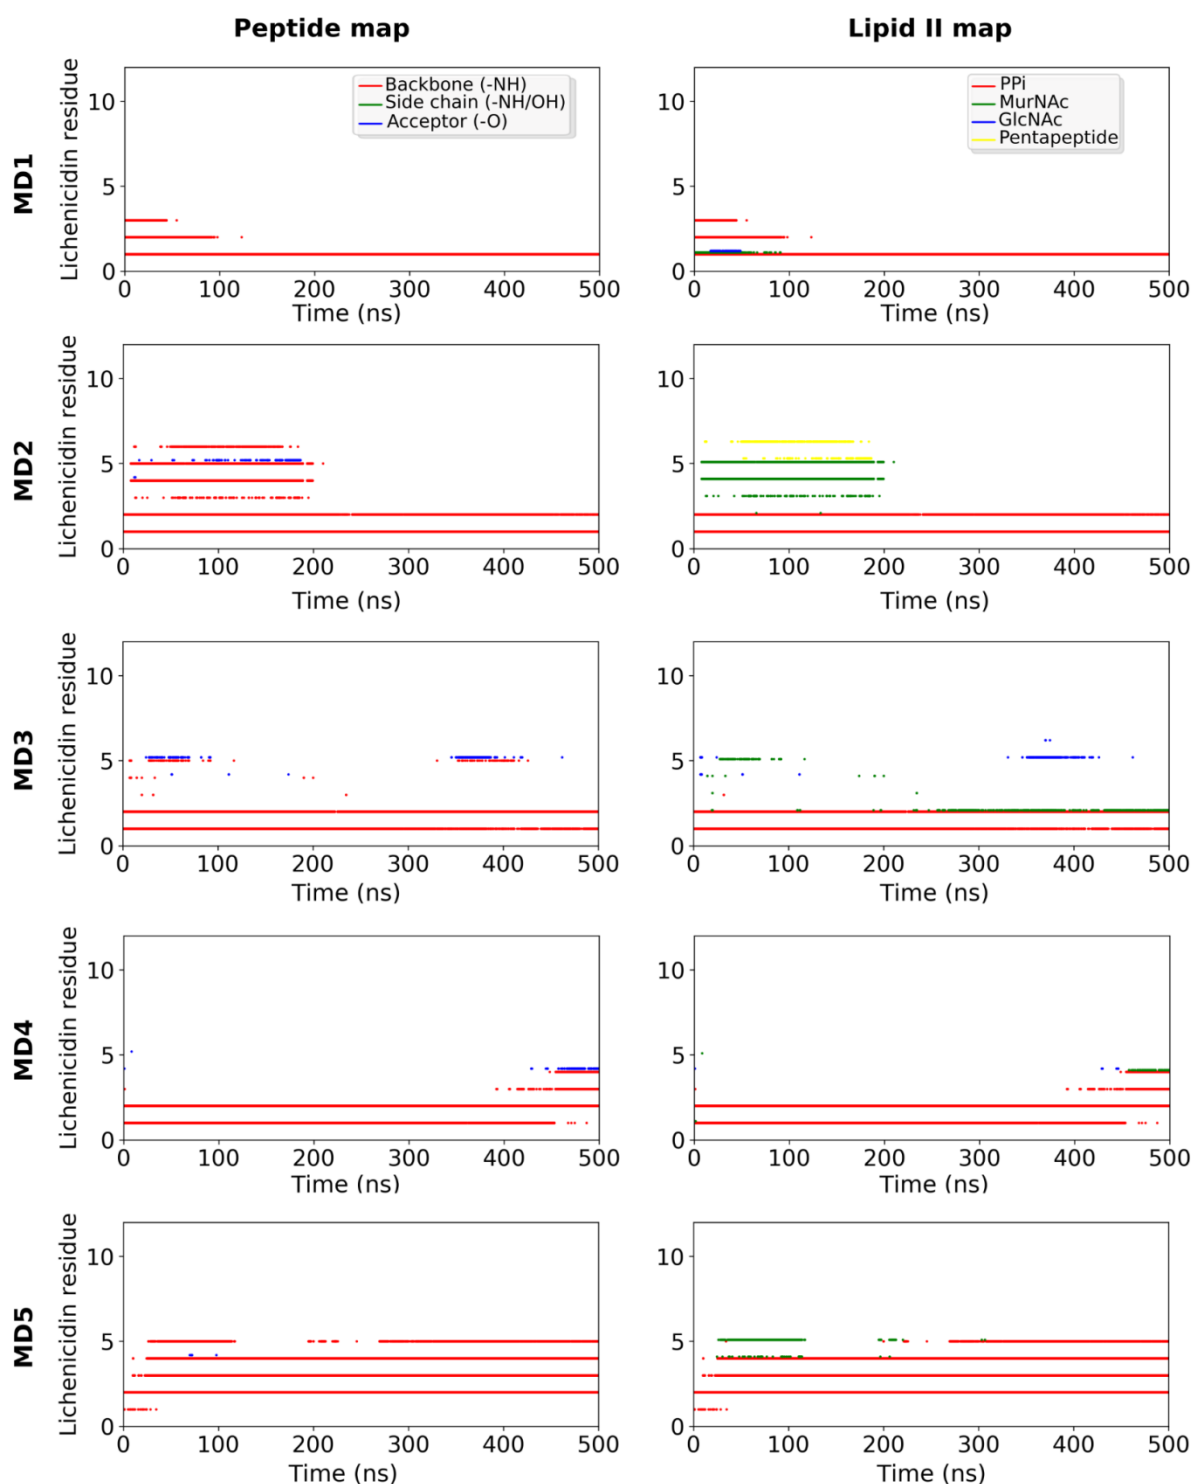

**Figure S9. Intermolecular hydrogen bonds in the *N*-terminal Lcha / lipid II complexes during MD simulations.** Hydrogen bonding maps demonstrate organization and dynamics of the complexes. *Left panel:* peptide's groups taking part in the h-bond formation in a certain MD time: backbone amide group which donates the proton (red dots), side chains (green) and backbone carbonyl group which accepts the proton (blue). *Right panel:* lipid II's groups participating in the formation of the same h-bonds: PPi (red), MurNAc sugar (green), GlcNAc sugar (blue) and the pentapeptide (yellow).

51

52

53

54

55

56

57

58

59

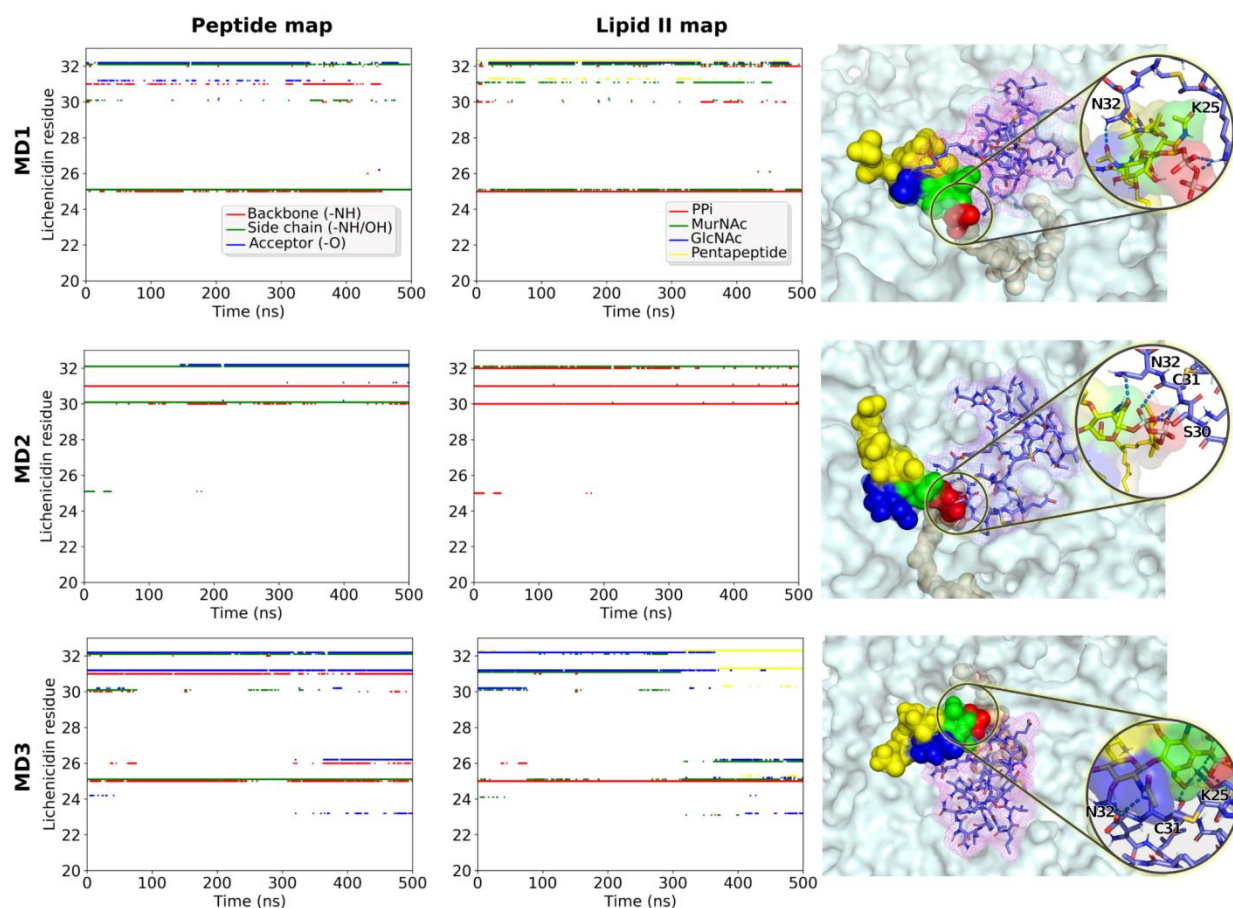

**Figure S10. Intermolecular hydrogen bonds in C-terminal Lch $\alpha$  / lipid II complexes in the membrane during MD simulations.** Hydrogen bonding maps demonstrate organization and dynamics of the complexes. *Left panel:* peptide's groups taking part in the h-bond formation in a certain MD time: backbone amide group which donates the proton (red dots), side chains (green) and backbone carbonyl group which accepts the proton (blue). *Middle panel:* lipid II's groups participating in the formation of the same h-bonds: PPI (red), MurNAc sugar (green), GlcNAc sugar (blue) and the pentapeptide (yellow). *Right panel:* the representative snapshots from MD. Lipid II is color-coded as in the middle panel. The surface of the membrane is shown. Interactions are zoomed in the insets.

Table S1. Chemical shift values (ppm) of the major Lch $\alpha$  form in water (30 °C, pH 4.0)

| Res  | atom           | $\delta_H$ | $\delta_C(\delta_N)$ | Res   | atom                             | $\delta_H$ | $\delta_C(\delta_N)$ | Res   | atom           | $\delta_H$ | $\delta_C(\delta_N)$ |
|------|----------------|------------|----------------------|-------|----------------------------------|------------|----------------------|-------|----------------|------------|----------------------|
| Obu1 | 3              | 2.83       | 30.2                 | Lys12 | H <sup>N</sup>                   | 8.29       | 123.0                | Abu22 | H <sup>N</sup> | 8.12       | 115.3                |
|      | 4              | 1.02       | 6.3                  |       | $\alpha$                         | 4.63       |                      |       | $\alpha$       | 4.60       |                      |
| Ile2 | H <sup>N</sup> | 8.54       | 117.5                |       | $\beta$                          | 1.80/ 1.70 | 29.9                 |       | $\beta$        | 3.69       | 44.4                 |
|      | $\alpha$       | 4.27       | 58.7                 |       | $\gamma$                         | 1.42/ 1.37 | 22.0                 | Val23 | $\gamma$       | 1.31       | 19.8                 |
|      | $\beta$        | 1.89       | 35.8                 |       | $\delta$                         | 1.64       | 26.5                 |       | H <sup>N</sup> | 7.51       | 119.2                |
|      | $\gamma_1$     | 1.48/1.19  | 24.9                 |       | $\epsilon$                       | 2.94       | 39.4                 |       | $\alpha$       | 4.50       |                      |
|      | $\gamma_2$     | 0.91       | 14.9                 | Pro13 | $\alpha$                         | 4.30       |                      |       | $\beta$        | 2.00       | 32.0                 |
|      | $\delta$       | 0.84       | 10.1                 |       | $\beta$                          | 2.14/ 1.87 | 29.1                 |       | $\gamma_1$     | 0.87       | 18.7                 |
| Abu3 | H <sup>N</sup> | 8.44       | 117.4                |       | $\gamma$                         | 2.00/ 1.92 | 24.7                 |       | $\gamma_2$     | 0.76       | 17.6                 |
|      | $\alpha$       | 4.58       |                      |       | $\delta$                         | 3.73/ 3.61 | 47.9                 | Abu24 | H <sup>N</sup> | 7.95       | 117.3                |
|      | $\beta$        | 3.52       | 41.0                 |       | H <sup>N</sup>                   | 8.12       | 121.2                |       | $\alpha$       | 4.64       |                      |
|      | $\gamma$       | 1.32       | 19.1                 | Leu14 | $\alpha$                         | 4.32       |                      |       | $\beta$        | 3.66       | 42.1                 |
| Leu4 | H <sup>N</sup> | 7.85       | 122.3                |       | $\beta$                          | 1.54       | 39.6                 |       | $\gamma$       | 1.26       | 19.6                 |
|      | $\alpha$       | 4.41       |                      |       | $\gamma$                         | 1.48       | 24.3                 | Lys25 | H <sup>N</sup> | 8.85       | 122.0                |
|      | $\beta$        | 1.69/1.64  | 38.4                 |       | $\delta$                         | 0.85/ 0.82 | 22.2/ 20.8           |       | $\alpha$       | 4.28       |                      |
|      | $\gamma$       | 1.41       | 24.2                 | Gly15 | H <sup>N</sup>                   | 8.22       | 109.6                |       | $\beta$        | 1.82       | 29.9                 |
|      | $\delta$       | 0.78/0.78  | 22.3/20.3            |       | $\alpha$                         | 3.96/ 3.80 | 42.8                 |       | $\gamma$       | 1.48       | 22.8                 |
| Dha5 | H <sup>N</sup> | 9.38       | 126.8                | Asn16 | H <sup>N</sup>                   | 8.35       | 119.2                |       | $\delta$       | 1.70       | 26.5                 |
|      | $\beta$        | 5.88/5.70  |                      |       | $\alpha$                         | 4.65       |                      |       | $\epsilon$     | 3.03       | 39.4                 |
| Dhb6 | H <sup>N</sup> | 9.84       | 119.1                |       | $\beta$                          | 2.83/ 2.70 | 36.1                 | Glu26 | H <sup>N</sup> | 8.50       | 116.2                |
|      | $\beta$        | 6.66       |                      |       | H <sup><math>\delta</math></sup> | 7.49/ 6.85 | 112.6                |       | $\alpha$       | 4.02       | 55.6                 |
|      | $\gamma$       | 1.79       | 12.8                 | Asn17 | H <sup>N</sup>                   | 8.34       | 117.6                |       | $\beta$        | 2.05       | 25.6                 |
| Cys7 | H <sup>N</sup> | 7.98       | 116.0                |       | $\alpha$                         | 4.62       |                      |       | $\gamma$       | 2.43       | 31.7                 |
|      | $\alpha$       | 4.32       |                      |       | $\beta$                          | 2.82/ 2.72 | 36.1                 | Cys27 | H <sup>N</sup> | 7.12       | 113.2                |
|      | $\beta$        | 3.07       | 30.8                 | Gly18 | H <sup><math>\delta</math></sup> | 7.48/ 6.85 | 112.6                |       | $\alpha$       | 4.66       |                      |
| Ala8 | H <sup>N</sup> | 8.14       | 123.7                |       | H <sup>N</sup>                   | 8.17       | 108.1                |       | $\beta$        | 2.98/2.78  |                      |
|      | $\alpha$       | 4.22       | 50.6                 |       | $\alpha$                         | 3.85       | 42.8                 | Met28 | H <sup>N</sup> | 7.87       | 119.3                |
|      | $\beta$        | 1.38       |                      | Tyr19 | H <sup>N</sup>                   | 7.91       | 119.9                |       | $\alpha$       | 4.92       |                      |
| Ile9 | H <sup>N</sup> | 7.71       | 117.9                |       | $\alpha$                         | 4.56       |                      |       | $\beta$        | 2.01       | 32.1                 |
|      | $\alpha$       | 4.04       | 58.5                 |       | $\beta$                          | 2.94/2.88  |                      |       | $\gamma$       | 2.48       | 29.2                 |

|                |            |           |           |              |            |            |           |  |              |            |                  |
|----------------|------------|-----------|-----------|--------------|------------|------------|-----------|--|--------------|------------|------------------|
|                | $\beta$    | 1.79      |           |              | $\delta$   | 6.99       |           |  | <b>E</b>     | 2.12       | 14.5             |
|                | $\gamma_1$ | 1.38/1.10 | 24.6      |              | $\epsilon$ | 6.77       |           |  | <b>Pro29</b> | $\alpha$   | 4.33             |
|                | $\gamma_2$ | 0.80      | 14.9      | <b>Leu20</b> | $H^N$      | 8.15       | 123.0     |  |              | $\beta$    | 2.32/ 1.94 29.3  |
|                | $\delta$   | 0.78      | 10.3      |              | $\alpha$   | 4.36       |           |  |              | $\gamma$   | 2.04/2.00 24.6   |
| <b>Leu10</b>   | $H^N$      | 7.99      | 124.6     |              | $\beta$    | 1.51/ 1.48 | 40.4      |  |              | $\delta$   | 3.80/ 3.76 48.2  |
|                | $\alpha$   | 4.27      |           |              | $\gamma$   | 1.43       | 24.3      |  | <b>Ser30</b> | $H^N$      | 7.60 109.5       |
|                | $\beta$    | 1.57/1.45 | 39.8      |              | $\delta$   | 0.85/ 0.80 | 22.2/20.9 |  |              | $\alpha$   | 4.31             |
|                | $\gamma$   | 1.54      | 24.3      | <b>Cys21</b> | $H^N$      | 8.42       | 122.0     |  |              | $\beta$    | 3.93/ 3.77 60.2  |
|                | $\delta$   | 0.84/0.80 | 22.3/20.9 |              | $\alpha$   | 4.61       |           |  | <b>Cys31</b> | $H^N$      | 7.73 122.6       |
| <b>D-Ala11</b> | $H^N$      | 8.17      | 118.9     |              | $\beta$    | 2.88       | 31.0      |  |              | $\alpha$   | 4.23             |
|                | $\alpha$   | 4.53      |           |              |            |            |           |  |              | $\beta$    | 2.73/ 2.89 32.8  |
|                | $\beta$    | 3.13/2.90 |           |              |            |            |           |  | <b>Asn32</b> | $H^N$      | 8.11 127.9       |
|                |            |           |           |              |            |            |           |  |              | $\alpha$   | 4.53             |
|                |            |           |           |              |            |            |           |  |              | $\beta$    | 2.74/ 2.64 38.0  |
|                |            |           |           |              |            |            |           |  |              | $H^\delta$ | 7.40/ 6.81 113.0 |

Table S2. Chemical shift values (ppm) of the major Lch $\alpha$  form in methanol (27 °C, pH 3.5)

| Res         | atom                         | $\delta_H$ | $\delta_C(\delta_N)$ | Res          | atom                         | $\delta_H$ | $\delta_C(\delta_N)$ | Res          | atom                         | $\delta_H$ | $\delta_C(\delta_N)$ |
|-------------|------------------------------|------------|----------------------|--------------|------------------------------|------------|----------------------|--------------|------------------------------|------------|----------------------|
| <b>Ile2</b> | <b>H<sup>N</sup></b>         | 8.43       | 114.5                | <b>Lys12</b> | <b>H<sup>N</sup></b>         | 8.20       | 120.1                | <b>Val23</b> | <b>H<sup>N</sup></b>         | 7.73       | 119.1                |
|             | <b><math>\alpha</math></b>   | 4.23       | 58.8                 |              | <b><math>\alpha</math></b>   | 4.65       |                      |              | <b><math>\alpha</math></b>   | 4.46       | 58.8                 |
|             | <b><math>\beta</math></b>    | 1.62       | 24.6                 |              | <b><math>\beta</math></b>    | 1.89/1.82  | 26.3                 |              | <b><math>\beta</math></b>    | 2.13       | 30.9                 |
|             | <b><math>\gamma_1</math></b> | 1.94/1.24  | 24.9                 |              | <b><math>\gamma</math></b>   | 1.52/1.46  |                      |              | <b><math>\gamma_1</math></b> | 0.94       | 18.7                 |
|             | <b><math>\gamma_2</math></b> | 0.98       | 14.6                 |              | <b><math>\delta</math></b>   | 1.71       | 26.6                 |              | <b><math>\gamma_2</math></b> | 0.86       | 17.9                 |
|             | <b><math>\delta</math></b>   | 0.94       | 9.7                  | <b>Pro13</b> | <b><math>\alpha</math></b>   | 4.41       | 61.5                 | <b>Abu24</b> | <b>H<sup>N</sup></b>         | 8.01       | 116.7                |
| <b>Abu3</b> | <b>H<sup>N</sup></b>         | 8.27       | 115.2                |              | <b><math>\beta</math></b>    | 2.17/1.92  | 28.9                 |              | <b><math>\alpha</math></b>   | 4.75       | 50.5                 |
|             | <b><math>\alpha</math></b>   | 4.71       | 57.6                 |              | <b><math>\gamma</math></b>   | 2.08/1.95  | 24.8                 |              | <b><math>\beta</math></b>    | 3.77       | 71.2                 |
|             | <b><math>\beta</math></b>    | 3.70       |                      |              | <b><math>\delta</math></b>   | 3.77/3.69  | 47.4                 |              | <b><math>\gamma</math></b>   | 1.27       | 31.6                 |
|             | <b><math>\gamma</math></b>   | 1.32       | 18.6                 | <b>Leu14</b> | <b>H<sup>N</sup></b>         | 8.12       | 117.1                | <b>Lys25</b> | <b>H<sup>N</sup></b>         | 8.93       | 122.2                |
| <b>Leu4</b> | <b>H<sup>N</sup></b>         | 7.78       | 120.6                |              | <b><math>\alpha</math></b>   | 4.28       | 52.8                 |              | <b><math>\alpha</math></b>   | 4.40       | 55.3                 |
|             | <b><math>\alpha</math></b>   | 4.55       | 52.1                 |              | <b><math>\beta</math></b>    | 1.72/1.64  |                      |              | <b><math>\beta</math></b>    | 1.92/1.82  | 30.3                 |
|             | <b><math>\beta</math></b>    | 1.81       | 26.4                 |              | <b><math>\gamma</math></b>   | 1.68       | 20.4                 |              | <b><math>\gamma</math></b>   | 1.66       | 23.0                 |
|             | <b><math>\gamma</math></b>   | 1.75/1.61  | 24.4/15.86           |              | <b><math>\delta</math></b>   | 0.91       |                      |              | <b><math>\delta</math></b>   | 3.14/3.06  | 39.4                 |
|             | <b><math>\delta</math></b>   | 0.89       | 22.0                 | <b>Gly15</b> | <b>H<sup>N</sup></b>         | 8.30       | 106.9                | <b>Glu26</b> | <b>H<sup>N</sup></b>         | 8.51       | 113.7                |
| <b>Dha5</b> | <b>H<sup>N</sup></b>         | 9.65       | 126.2                |              | <b><math>\alpha</math></b>   | 3.97/3.87  | 42.9                 |              | <b><math>\alpha</math></b>   | 4.09       | 55.2                 |
|             | <b><math>\beta</math></b>    | 5.56/4.96  |                      | <b>Asn16</b> | <b>H<sup>N</sup></b>         | 8.22       | 118.0                |              | <b><math>\beta</math></b>    | 2.08       |                      |
| <b>Dhb6</b> | <b>H<sup>N</sup></b>         | 10.13      | 117.4                |              | <b><math>\alpha</math></b>   | 4.76       | 57.1                 |              | <b><math>\gamma</math></b>   | 2.57       | 30.4                 |
|             | <b><math>\beta</math></b>    | 6.66       |                      |              | <b><math>\beta</math></b>    | 2.94/2.67  | 36.4                 | <b>Cys27</b> | <b>H<sup>N</sup></b>         | 7.21       | 112.2                |
|             | <b><math>\gamma</math></b>   | 1.87       | 11.86                | <b>Asn17</b> | <b>H<sup>N</sup></b>         | 8.26       | 116.2                |              | <b><math>\alpha</math></b>   | 4.75       | 54.8                 |
| <b>Cys7</b> | <b>H<sup>N</sup></b>         | 8.03       | 115.5                |              | <b><math>\alpha</math></b>   | 4.68       | 50.7                 |              | <b><math>\beta</math></b>    | 3.00       | 39.7                 |
|             | <b><math>\alpha</math></b>   | 4.26       |                      |              | <b><math>\beta</math></b>    | 2.85/2.91  | 37.3                 | <b>Met28</b> | <b>H<sup>N</sup></b>         | 7.81       | 116.9                |
|             | <b><math>\beta</math></b>    | 3.17       |                      | <b>Gly18</b> | <b>H<sup>N</sup></b>         | 8.2        | 105.2                |              | <b><math>\alpha</math></b>   | 5.01       | 50.3                 |
| <b>Ala8</b> | <b>H<sup>N</sup></b>         | 8.23       | 121.9                |              | <b><math>\alpha</math></b>   | 3.93/3.74  | 42.6                 |              | <b><math>\beta</math></b>    | 2.04       |                      |
|             | <b><math>\alpha</math></b>   | 4.21       | 51.7                 | <b>Tyr19</b> | <b>H<sup>N</sup></b>         | 7.95       | 118.1                |              | <b><math>\gamma</math></b>   | 2.52       | 29.6                 |
|             | <b><math>\beta</math></b>    | 1.61       |                      |              | <b><math>\alpha</math></b>   | 4.52       | 52.2                 | <b>Pro29</b> | <b><math>\alpha</math></b>   | 4.38       | 62.7                 |
| <b>Ile9</b> | <b>H<sup>N</sup></b>         | 7.47       | 112.3                |              | <b><math>\beta</math></b>    | 3.03/2.90  | 36.5                 |              | <b><math>\beta</math></b>    | 2.37/1.99  | 29.2                 |
|             | <b><math>\alpha</math></b>   | 4.14       | 65.1                 |              | <b><math>\delta</math></b>   | 7.07       |                      |              | <b><math>\gamma</math></b>   | 2.10       | 24.6                 |
|             | <b><math>\beta</math></b>    | 1.96       |                      |              | <b><math>\epsilon</math></b> | 6.69       |                      |              | <b><math>\delta</math></b>   | 3.94/3.83  | 48.0                 |
|             | <b><math>\gamma_1</math></b> | 1.51/1.26  | 24.9                 | <b>Leu20</b> | <b>H<sup>N</sup></b>         | 8.12       | 118.98               | <b>Ser30</b> | <b>H<sup>N</sup></b>         | 7.27       | 106.3                |



Table S3. Chemical shift values (ppm) of the major Lch $\alpha$  form in DPC micelles (45 °C, pH 5.8)

| Res  | atom           | $\delta_H$ | $\delta_C(\delta_N)$ | Res   | atom                             | $\delta_H$ | $\delta_C(\delta_N)$ | Res   | atom           | $\delta_H$ | $\delta_C(\delta_N)$ |
|------|----------------|------------|----------------------|-------|----------------------------------|------------|----------------------|-------|----------------|------------|----------------------|
| Obu1 | 3              | 1.83       | 30.2                 | Lys12 | H <sup>N</sup>                   | 8.43       | 122.3                | Val23 | H <sup>N</sup> | 7.57       | 117.5                |
|      | 4              | 2.90       | 6.8                  |       | $\alpha$                         | 4.63       |                      |       | $\alpha$       | 4.66       |                      |
| Ile2 | H <sup>N</sup> | 8.55       | 116.4                |       | $\beta$                          | 1.98       | 30.0                 |       | $\beta$        | 2.13       | 27.6                 |
|      | $\alpha$       | 4.32       |                      |       | $\gamma$                         | 1.61       | 22.6                 |       | $\gamma_1$     | 1.02       | 19.0                 |
|      | $\beta$        | 2.07       | 35.5                 |       | $\delta$                         | 1.84       | 26.7                 |       | $\gamma_2$     | 0.92       | 17.8                 |
|      | $\gamma_1$     | 1.68/ 1.31 | 25.1                 |       | $\epsilon$                       | 3.18       | 39.6                 | Abu24 | H <sup>N</sup> | 7.75       | 116.3                |
|      | $\gamma_2$     | 1.07       | 15.4                 | Pro13 | $\alpha$                         | 4.51       |                      |       | $\alpha$       | 4.95       |                      |
|      | $\delta$       | 0.97       | 11.0                 |       | $\beta$                          | 2.32/ 1.97 | 28.9                 |       | $\beta$        | 3.88       | 48.3                 |
| Abu3 | H <sup>N</sup> | 8.35       | 116.1                |       | $\gamma$                         | 2.19/ 2.09 | 25.2                 |       | $\gamma$       | 1.42       | 19.8                 |
|      | $\alpha$       | 4.81       |                      |       | $\delta$                         | 3.83/ 3.78 | 47.8                 | Lys25 | H <sup>N</sup> | 9.08       | 122.2                |
|      | $\beta$        | 3.80       |                      | Leu14 | H <sup>N</sup>                   | 7.97       | 118.0                |       | $\alpha$       | 4.23       |                      |
|      | $\gamma$       | 1.46       | 18.4                 |       | $\alpha$                         | 4.49       |                      |       | $\beta$        | 1.96       | 30.0                 |
| Leu4 | H <sup>N</sup> | 7.95       | 122.3                |       | $\beta$                          | 1.77       |                      |       | $\gamma$       | 1.52/ 1.58 | 22.4                 |
|      | $\alpha$       | 4.54       |                      |       | $\gamma$                         |            |                      |       | $\delta$       | 1.81       | 24.8                 |
|      | $\beta$        | 1.81       | 39.5                 |       | $\delta$                         |            |                      |       | $\epsilon$     | 3.10       | 39.7                 |
|      | $\gamma$       | 1.65       | 25.1                 | Gly15 | H <sup>N</sup>                   | 8.29       | 108.8                | Glu26 | H <sup>N</sup> | 8.83       | 116.6                |
|      | $\delta$       | 0.96       | 21.5                 |       | $\alpha$                         | 4.14/ 4.03 | 42.9                 |       | $\alpha$       | 4.15       |                      |
| Dha5 | H <sup>N</sup> | 9.16       | 125.2                | Asn16 | H <sup>N</sup>                   | 8.54       | 119.5                |       | $\beta$        | 2.17       | 26.6                 |
|      | $\beta$        | 5.56/ 4.96 |                      |       | $\alpha$                         | 4.78       |                      |       | $\gamma$       | 2.44       | 34.1                 |
| Dhb6 | H <sup>N</sup> | 10.33      | 116.4                |       | $\beta$                          | 3.00/ 2.87 | 36.3                 | Cys27 | H <sup>N</sup> | 7.32       | 113.2                |
|      | $\beta$        | 6.88       |                      |       | H <sup><math>\delta</math></sup> | 7.65/ 6.92 | 112.2                |       | $\alpha$       | 4.81       |                      |
|      | $\gamma$       | 1.95       | 12.9                 | Asn17 | H <sup>N</sup>                   | 8.30       | 117.5                |       | $\beta$        | 3.05/ 2.91 | 37.3                 |
| Cys7 | H <sup>N</sup> | 8.20       | 116.2                |       | $\alpha$                         | 4.82       |                      | Met28 | H <sup>N</sup> | 8.09       | 118.7                |
|      | $\alpha$       | 4.38       |                      |       | $\beta$                          | 2.99/ 2.85 | 37.0                 |       | $\alpha$       | 5.06       |                      |
|      | $\beta$        | 3.25       | 43.7                 |       | H <sup><math>\delta</math></sup> | 7.66/ 6.96 | 112.7                |       | $\beta$        | 2.27       | 32.4                 |
| Ala8 | H <sup>N</sup> | 8.54       | 123.0                | Gly18 | H <sup>N</sup>                   | 8.19       | 107.9                |       | $\gamma$       | 2.68       | 29.5                 |
|      | $\alpha$       | 4.39       |                      |       | $\alpha$                         | 4.03       | 42.7                 |       | $\epsilon$     | 2.31       | 15.0                 |
|      | $\beta$        | 1.67       | 24.5                 | Tyr19 | H <sup>N</sup>                   | 8.09       | 119.7                | Pro29 | $\alpha$       | 4.49       | 62.7                 |
| Ile9 | H <sup>N</sup> | 7.66       | 113.6                |       | $\alpha$                         | 4.68       |                      |       | $\beta$        | 2.48/ 2.10 |                      |
|      | $\alpha$       | 4.30       |                      |       | $\beta$                          | 3.09/ 3.01 | 36.9                 |       |                |            |                      |

|                |            |            |       |              |          |            |            |              |              |            |       |
|----------------|------------|------------|-------|--------------|----------|------------|------------|--------------|--------------|------------|-------|
|                | $\beta$    | 2.07       | 25.1  |              |          |            |            |              | $\gamma$     | 2.22/ 2.15 | 24.8  |
|                | $\gamma_1$ | 1.35/ 1.64 | 24.5  |              |          |            |            |              | $\delta$     | 3.93/ 3.88 | 48.4  |
|                | $\gamma_2$ | 1.03       | 15.4  | <b>Leu20</b> | $H^N$    | 8.18       | 120.1      | <b>Ser30</b> | $H^N$        | 7.88       | 101.0 |
|                | $\delta$   | 1.00       | 10.3  |              | $\alpha$ | 4.49       |            |              | $\alpha$     | 4.44       |       |
| <b>Leu10</b>   | $H^N$      | 7.83       | 119.6 |              | $\beta$  | 1.72       | 40.1       |              | $\beta$      | 4.02/ 3.95 | 60.5  |
|                | $\alpha$   | 4.40       |       |              | $\gamma$ | 1.64       |            | <b>Cys31</b> | $H^N$        | 7.82       | 121.2 |
|                | $\beta$    | 1.83/ 1.72 | 39.9  |              | $\delta$ | 1.00/ 0.96 | 22.6/ 22.5 |              | $\alpha$     | 4.45       |       |
|                | $\gamma$   | 1.67       | 29.8  | <b>Cys21</b> | $H^N$    | 8.38       | 122.9      |              | $\beta$      | 3.10/ 2.94 | 37.0  |
|                | $\delta$   | 1.01/ 0.98 | 22.8  |              | $\alpha$ | 4.54       |            | <b>Asn32</b> | $H^N$        | 8.01       | 127.2 |
| <b>D-Ala11</b> | $H^N$      | 8.23       | 117.3 |              | $\beta$  | 3.06       |            |              | $\alpha$     | 4.62       |       |
|                | $\alpha$   | 4.45       |       | <b>Abu22</b> | $H^N$    | 8.23       | 112.8      |              | $\beta$      | 2.89/ 2.78 | 38.6  |
|                | $\beta$    | 3.00/ 2.85 |       |              | $\alpha$ | 4.73       |            |              | $H^{\delta}$ | 7.41/ 6.96 | 112.8 |
|                |            |            |       |              | $\beta$  | 3.85       |            |              |              |            |       |
|                |            |            |       |              | $\gamma$ | 1.42       | 19.9       |              |              |            |       |



Table S4. Chemical shift values (ppm) of lipid II in DPC micelles (45 °C, pH 5.8)

| Res              | atom           | $\delta_H$ | $\delta_C(\delta_N)$ | Res             | atom            | $\delta_H$ | $\delta_C(\delta_N)$ | Res              | atom           | $\delta_H$ | $\delta_C(\delta_N)$ |
|------------------|----------------|------------|----------------------|-----------------|-----------------|------------|----------------------|------------------|----------------|------------|----------------------|
| Ala1             | H <sup>N</sup> | 8.30       |                      | GlcNAc          | H               | 8.38       |                      | IR <sub>2</sub>  | H <sub>1</sub> | 2.22       | 26.3                 |
|                  | $\alpha$       | 4.51       | 49.9                 |                 | H <sub>1</sub>  | 4.77       | 100.1                |                  | H <sub>2</sub> | 5.34       | 45.1                 |
|                  | $\beta$        | 1.52       | 16.9                 |                 | H <sub>2</sub>  | 3.56       | 70.8                 |                  | H <sub>4</sub> | 2.24       | 32.0                 |
| $\gamma$ -D-Glu2 | H <sup>N</sup> | 7.88       |                      |                 | H <sub>3</sub>  | 3.56       | 76.1                 |                  | H <sub>5</sub> | 1.83       | 23.1                 |
|                  | $\alpha$       | 4.33       | 54.6                 |                 | H <sub>4</sub>  | 4.27       | 78.4                 | IR <sub>3</sub>  | H <sub>1</sub> | 2.20       | 26.3                 |
|                  | $\beta$        | 2.47/2.10  | 32.1                 |                 | H <sub>5</sub>  | 3.75       | 74.1                 |                  | H <sub>2</sub> | 5.27       | 45.1                 |
|                  | $\gamma$       | 2.26/2.02  | 28.4                 |                 | H <sub>6</sub>  | 4.13/3.84  | 61.5                 |                  | H <sub>4</sub> | 2.18       | 32.2                 |
| Lys3             | H <sup>N</sup> | 8.29       |                      |                 | H <sub>8</sub>  | 2.14       | 26.4                 |                  | H <sub>5</sub> | 1.80       | 23.2                 |
|                  | $\alpha$       | 4.38       | 54.4                 | MurNAc          | H               | 8.49       |                      | IR <sub>4</sub>  | H <sub>1</sub> | 2.19       | 26.3                 |
|                  | $\beta$        | 1.96/1.92  | 30.8                 |                 | H <sub>1</sub>  | 5.60       | 94.0                 |                  | H <sub>2</sub> | 5.36       | 45.0                 |
|                  | $\gamma$       | 1.61/1.64  | 22.3                 |                 | H <sub>2</sub>  | 4.27       | 72.6                 |                  | H <sub>4</sub> | 2.17       | 32.2                 |
|                  | $\delta$       | 1.84       | 26.6                 |                 | H <sub>3</sub>  | 3.99       | 78.0                 |                  | H <sub>5</sub> | 1.78       | 23.1                 |
|                  | $\epsilon$     | 3.16       | 39.7                 |                 | H <sub>4</sub>  | 4.10       | 74.4                 | IR <sub>5</sub>  | H <sub>1</sub> | 2.18       | 26.3                 |
| D-Ala4           | H <sup>N</sup> | 7.97       |                      |                 | H <sub>5</sub>  | 3.96       | 70.1                 |                  | H <sub>2</sub> | 5.24       | 45.0                 |
|                  | $\alpha$       | 4.44       | 50.1                 |                 | H <sub>6</sub>  | 4.04/3.89  | 60.2                 |                  | H <sub>4</sub> | 2.15       | 32.2                 |
|                  | $\beta$        | 1.58       | 17.3                 |                 | H <sub>8</sub>  | 1.95       | 22.3                 |                  | H <sub>5</sub> | 1.76       | 23.1                 |
| D-Ala5           | H <sup>N</sup> | 7.91       |                      |                 | H <sub>11</sub> | 1.59       | 19.0                 | IR <sub>11</sub> | H <sub>1</sub> | 2.12       | 26.4                 |
|                  | $\alpha$       | 4.27       | 51.1                 | IR <sub>1</sub> | H <sub>1</sub>  | 4.6        | 62.5                 |                  | H <sub>2</sub> | 5.15       | 44.2                 |
|                  | $\beta$        | 1.48       | 17.9                 |                 | H <sub>2</sub>  | 5.61       | 42.2                 |                  | H <sub>4</sub> | 1.70       | 25.3                 |
|                  |                |            |                      |                 | H <sub>4</sub>  | 2.28       | 32.1                 |                  | H <sub>5</sub> | 1.63       | 15.5                 |
|                  |                |            |                      |                 | H <sub>5</sub>  | 1.89       | 23.0                 |                  |                |            |                      |

**Table S5. Statistics for the best CYANA structures of the major conformational state of Lch $\alpha$  in methanol solution**

| Parameter (Unit)                                                                       | Quantity                   | Lch $\alpha$    |
|----------------------------------------------------------------------------------------|----------------------------|-----------------|
| No. of structures                                                                      | calculated                 | 200             |
|                                                                                        | selected                   | 20              |
| Target function ( $\text{\AA}^2$ )                                                     |                            | $0.62 \pm 0.06$ |
| No. of distance constraints<br>(upper/lower)                                           | NOE                        | 158/70          |
|                                                                                        | Lanthionine-bond (4 bonds) | 8/4             |
| No. of torsion angle constraints                                                       | Angle $\phi$               | 16              |
| Upper constraint violations ( $>0.2 \text{ \AA}$ )                                     | No.                        | 1               |
|                                                                                        | max ( $\text{\AA}$ )       | 0.26            |
| Lower constraint violations ( $>0.2 \text{ \AA}$ )                                     | No.                        | 0               |
| Van der Waals constraint violations<br>( $>0.2 \text{ \AA}$ )                          | No.                        | 0               |
| Angle constraint violations ( $>5^\circ$ )                                             | No.                        | 0               |
| rmsd of atomic coordinates ( $\text{\AA}$ )<br>overall (Obu-Asn32)                     | backbone                   | $5.37 \pm 1.79$ |
|                                                                                        | heavy atoms                | $6.25 \pm 2.01$ |
| rmsd of atomic coordinates ( $\text{\AA}$ )<br><i>N</i> -terminal domain (Ile2-Leu10)  | backbone                   | $0.83 \pm 0.47$ |
|                                                                                        | heavy atoms                | $1.22 \pm 0.47$ |
| rmsd of atomic coordinates ( $\text{\AA}$ )<br>central domain (D-Ala11-Cys21)          | backbone                   | $2.28 \pm 0.48$ |
|                                                                                        | heavy atoms                | $3.67 \pm 0.66$ |
| rmsd of atomic coordinates ( $\text{\AA}$ )<br><i>C</i> -terminal domain (Abu22-Asn32) | backbone                   | $0.49 \pm 0.20$ |
|                                                                                        | heavy atoms                | $1.15 \pm 0.24$ |

83

84

85

86
